# Supplementary material for: An Integrated Systems Approach Unveils New Aspects of Microoxia-Mediated Regulation in Bradyrhizobium diazoefficiens
Source: Front Microbiol. 2019 May 7;10:924. doi: 10.3389/fmicb.2019.00924 (PMC6515984; doi:10.3389/fmicb.2019.00924)
Supplement: Supplementary Table S1 — List of 223 CDS located in the ~202 kb genomic region that is deleted in B. diazoefficiens 110spc4 compared to the USDA110 NCBI reference genome (corresponding to nucleotide positions 8,974,768–9,105,828 and 1–70,634). The respective COG classification was determined using the eggNOG database “bactNOG” (Huerta-Cepas et al., 2016) and is shown for 142 of the 223 CDSs. [file Table_1.XLSX]

## Sheet: Supplementary_Table_S1
Locus_tag	Start	Stop	Length (aa)	GeneName	Protein_ID	Protein_name	COGs
blr8173	8974193	8974813	206	radC	NP_774813.1	DNA repair protein	L
blr8174	8974971	8976212	413		NP_774814.1	site-specific integrase/recombinase	S
blr8175	8976155	8977552	465		NP_774815.1	hypothetical protein	S
blr8176	8977554	8978807	417		NP_774816.1	hypothetical protein
bll8177	8978898	8981387	829		NP_774817.1	hypothetical protein	S
bll8178	8981698	8982564	288		NP_774818.1	hypothetical protein
bll8179	8982634	8983296	220		NP_774819.1	hypothetical protein
blr8180	8983334	8985121	595		NP_774820.1	hypothetical protein
blr8181	8985162	8986271	369		NP_774821.1	transposase	L
bll8182	8986282	8987046	254		NP_774822.1	transposase	L
bll8183	8987605	8988669	354		NP_774823.1	transposase	L
bll8184	8988927	8989553	208		NP_774824.1	hypothetical protein	S
blr8185	8989776	8990384	202		NP_774825.1	transcriptional regulator	K
blr8186	8990517	8991191	224		NP_774826.1	hypothetical protein	S
blr8187	8991296	8992174	292		NP_774827.1	dehydrogenase	S
blr8188	8992171	8993019	282		NP_774828.1	dehalogenase	S
blr8189	8993032	8993655	207		NP_774829.1	hypothetical protein	S
blr8190	8993775	8994227	150		NP_774830.1	hypothetical protein	S
blr8191	8994587	8995342	251		NP_774831.1	hypothetical protein	S
bll8192	8995107	8995829	240		NP_774832.1	transposase	L
blr8193	8995713	8996813	366		NP_774833.1	site-specific integrase/recombinase	S
blr8194	8996641	8997231	196		NP_774834.1	transposase	L
bll8195	8997468	8998799	443		NP_774835.1	group II intron, maturase/reverse transcriptase	L
bll8196	8998732	8999568	278		NP_774836.1	outer-membrane immunogenic protein	M
blr8197	9000012	9000680	222		NP_774837.1	partition protein	D
blr8198	9000643	9001680	345		NP_774838.1	hypothetical protein
bll8199	9001685	9002548	287		NP_774839.1	transposase	L
bll8200	9002548	9004047	499		NP_774840.1	transposase	L
bll8201	9004347	9004889	180		NP_774841.1	hypothetical protein
bll8202	9005859	9006389	176		NP_774842.1	hypothetical protein
bll8203	9006361	9006765	134		NP_774843.1	hypothetical protein	S
blr8204	9007037	9007393	118		NP_774844.1	transposase	L
bll8205	9007492	9008250	252		NP_774845.1	maturase; reverse transcriptase	L
bll8206	9008410	9008970	186		NP_774846.1	maturase; reverse transcriptase	L
bll8207	9008977	9009306	109		NP_774847.1	hypothetical protein
bsl8208	9009307	9009471	54		NP_774848.1	hypothetical protein
bll8209	9009395	9009877	160		NP_774849.1	hypothetical protein	L
bsl8210	9009874	9010098	74		NP_774850.1	hypothetical protein	L
bsl8211	9010179	9010394	71		NP_774851.1	hypothetical protein
bll8212	9010444	9011577	377		NP_774852.1	hypothetical protein	C, H
bsr8213	9011839	9012129	96		NP_774853.1	hypothetical protein
bsr8214	9012099	9012509	136		NP_774854.2	transposase	L
blr8215	9012510	9012920	136		NP_774855.1	transposase	L
blr8216	9012921	9013280	119		NP_774856.1	transposase	L
blr8217	9013277	9013903	208		NP_774857.1	transposase	L
blr8218	9013624	9013926	100		NP_774858.1	transposase	L
blr8219	9014032	9015573	513		NP_774859.1	transposase	L
blr8220	9015592	9016353	253		NP_774860.1	transposase	L
bsr8221	9016476	9016703	75		NP_774861.1	transposase, partial	L
blr8222	9016881	9017282	133		NP_774862.1	transposase	L
bll8223	9017394	9017858	154		NP_774863.1	hypothetical protein
blr8224	9018032	9018382	116		NP_774864.1	hypothetical protein
bsr8225	9018447	9018671	74		NP_774865.1	hypothetical protein
blr8226	9018728	9019114	128		NP_774866.1	hypothetical protein	L
bll8227	9019038	9019355	105		NP_774867.1	hypothetical protein	L
bsl8228	9019475	9019717	80		NP_774868.1	hypothetical protein
bll8229	9019866	9020912	348		NP_774869.1	hypothetical protein	M
bll8230	9020903	9021700	265		NP_774870.1	hypothetical protein
bll8231	9021763	9023514	583		NP_774871.1	gamma-glutamyltranspeptidase	E
bll8232	9023393	9024892	499		NP_774872.1	hypothetical protein	E
blr8233	9024866	9026317	483		NP_774873.1	transposase	L
blr8234	9026653	9027030	125		NP_774874.1	hypothetical protein	L
blr8235	9027176	9027535	119		NP_774875.1	transposase	L
blr8236	9027532	9028359	275		NP_774876.1	transposase	L
bll8237	9028395	9028709	104		NP_774877.1	hypothetical protein	L
bll8238	9028763	9029119	118		NP_774878.1	hypothetical protein	L
bll8239	9029116	9029514	132		NP_774879.1	hypothetical protein	L
blr8240	9029671	9030015	114		NP_774880.1	hypothetical protein
bsr8241	9031331	9031588	85		NP_774881.1	hypothetical protein	S
bsl8242	9031686	9031862	58		NP_774882.1	transposase	L
blr8243	9031915	9032721	268		NP_774883.1	hypothetical protein
bll8244	9032323	9036648	1441		NP_774884.1	hypothetical protein	S
bsr8245	9037621	9037863	80		NP_774885.1	hypothetical protein	S
bsr8246	9037969	9038211	80		NP_774886.1	hypothetical protein
bsr8247	9039598	9039882	94		NP_774887.1	hypothetical protein	S
bll8248	9039843	9040172	109		NP_774888.1	hypothetical protein
bsl8249	9042146	9042349	67	cspA	NP_774889.1	cold shock protein	K
bll8250	9042366	9043772	468		NP_774890.1	hypothetical protein	S
bll8251	9043933	9044385	150		NP_774891.1	hypothetical protein	S
bsl8252	9044400	9044615	71		NP_774892.1	hypothetical protein
bsl8253	9044612	9044890	92		NP_774893.1	hypothetical protein	S
blr8254	9045040	9045678	212		NP_774894.1	hypothetical protein
bll8255	9045644	9046177	177		NP_774895.1	hypothetical protein
bll8256	9046375	9046983	202		NP_774896.1	hypothetical protein
bll8257	9047328	9048755	475		NP_774897.1	hypothetical protein	L
bll8258	9048770	9049162	130		NP_774898.1	hypothetical protein
bll8259	9049119	9049790	223		NP_774899.1	hypothetical protein	S
blr8260	9050435	9050794	119		NP_774900.1	transposase	L
blr8261	9050791	9051618	275		NP_774901.1	transposase	L
bsr8262	9052670	9052954	94		NP_774902.1	hypothetical protein	S
bsr8263	9053385	9053621	78		NP_774903.1	hypothetical protein
bsl8264	9054821	9055015	64		NP_774904.1	hypothetical protein
bsl8265	9055383	9055664	93		NP_774905.1	hypothetical protein
bsr8266	9055629	9055874	81		NP_774906.1	hypothetical protein
blr8267	9056650	9056952	100		NP_774907.1	hypothetical protein
bsl8268	9057105	9057293	62		NP_774908.1	hypothetical protein
blr8269	9057963	9058364	133		NP_774909.1	hypothetical protein
blr8270	9058576	9059949	457		NP_774910.1	transposase	L
blr8271	9060089	9060751	220		NP_774911.1	transcriptional regulator	K
blr8272	9060873	9062501	542		NP_774912.1	phosphoglucomutase phosphomannomutase	G
blr8273	9063445	9064566	373		NP_774913.1	transcriptional regulator	K
bll8274	9064872	9065573	233		NP_774914.1	hypothetical protein	G
bll8275	9065392	9066147	251		NP_774915.1	hypothetical protein	G
bll8276	9066200	9066865	221		NP_774916.1	hypothetical protein	S
bll8277	9066805	9067746	313		NP_774917.1	hypothetical protein	S
bsl8278	9067869	9068093	74		NP_774918.1	hypothetical protein	S
bll8279	9068090	9069292	400	trbI	NP_774919.1	conjugal transfer protein	U
bll8280	9069283	9070362	359	trbG	NP_774920.1	conjugal transfer protein	U
bll8281	9070359	9071048	229	trbF	NP_774921.1	conjugal transfer protein TrbF	U
bll8282	9071052	9072413	453	trbL	NP_774922.1	conjugal transfer protein TrbL	U
bll8283	9072410	9072730	106		NP_774923.1	hypothetical protein	S
bll8284	9072741	9073499	252	trbJ	NP_774924.1	conjugal transfer protein TrbJ	U
bll8285	9073496	9075934	812	trbE	NP_774925.1	conjugal transfer ATPase TrbE	U
bsl8286	9075942	9076220	92	trbD	NP_774926.1	conjugal transfer protein	U
bll8287	9076217	9076558	113	trbC	NP_774927.1	conjugal transfer protein	U
bll8288	9076555	9077553	332	trbB	NP_774928.1	conjugal transfer protein	U
blr8289	9077792	9078289	165		NP_774929.1	IS66 family insertion sequence hypothetical protein	L
bll8290	9078152	9078973	273		NP_774930.1	transposase	L
bll8291	9078475	9079104	209		NP_774931.1	transposase	L
blr8292	9079279	9079632	117		NP_774932.1	hypothetical protein	L
bll8293	9079793	9080857	354		NP_774933.1	transposase	L
bll8294	9081154	9081555	133		NP_774934.1	hypothetical protein
bll8295	9081563	9082783	406		NP_774935.1	ATP-binding protein	V
blr8296	9082677	9084413	578		NP_774936.1	hypothetical protein	K
blr8297	9084512	9084925	137		NP_774937.1	hypothetical protein	S
blr8298	9085198	9087369	723		NP_774938.1	hypothetical protein	S
blr8299	9087290	9089524	744		NP_774939.1	hypothetical protein	S
blr8300	9089524	9090591	355		NP_774940.1	hypothetical protein	S
blr8301	9090890	9091855	321		NP_774941.1	transposase	L
blr8302	9092176	9092685	169		NP_774942.1	hypothetical protein
blr8303	9092579	9093508	309		NP_774943.1	hypothetical protein	S
bll8304	9093833	9094309	158		NP_774944.1	hypothetical protein	S
bsl8305	9094349	9094528	59		NP_774945.1	hypothetical protein
blr8306	9094611	9095192	193		NP_774946.1	transposase	L
bll8307	9095606	9096109	167		NP_774947.1	hypothetical protein	S
bll8308	9096192	9097403	403		NP_774948.1	hypothetical protein
bll8309	9097400	9098731	443		NP_774949.1	hypothetical protein	H
bll8310	9098873	9099226	117		NP_774950.1	hypothetical protein
bsr8311	9100093	9100350	85		NP_774951.1	hypothetical protein
bsl8312	9100347	9100625	92	hupT	NP_774952.1	HNS-type DNA binding protein	L
bll8313	9100622	9101206	194		NP_774953.1	maturase	L
bsl8314	9102081	9102275	64		NP_774954.1	hypothetical protein
bsl8315	9102787	9103083	98		NP_774955.1	hypothetical protein	S
bsr8316	9103959	9104132	57		NP_774956.1	hypothetical protein	S
bsl8317	9105579	9105797	72		NP_774957.1	hypothetical protein
blr0001	102	428	108		NP_766641.1	hypothetical protein
blr0002	484	1023	179		NP_766642.1	hypothetical protein
blr0003	3089	3682	197		NP_766643.1	hypothetical protein	M
bsr0004	4239	4391	50		NP_766644.1	hypothetical protein
bll0005	4427	4750	107		NP_766645.1	hypothetical protein
bll0006	4972	6054	360	nrdF	NP_766646.1	ribonucleotide-diphosphate reductase subunit beta	F
bll0007	6036	8207	723		NP_766647.1	ribonucleotide-diphosphate reductase subunit alpha	F
bll0008	8380	8688	102		NP_766648.1	hypothetical protein
bll0009	8962	9714	250		NP_766649.1	acetyltransferase	K
bll0010	10345	10743	132		NP_766650.1	hypothetical protein
bll0011	10872	11492	206		NP_766651.1	hypothetical protein	L
blr0012	11482	11955	157		NP_766652.1	hypothetical protein	L
blr0013	12282	12815	177		NP_766653.1	transposase	L
bll0014	13421	13804	127		NP_766654.1	hypothetical protein
bll0015	13680	14069	129		NP_766655.1	transposase	L
bsl0016	14066	14329	87		NP_766656.1	hypothetical protein	L
blr0017	14685	15044	119		NP_766657.1	transposase	L
blr0018	15041	15868	275		NP_766658.1	transposase	L
blr0019	16189	16518	109		NP_766659.1	hypothetical protein
bll0020	17139	18371	410		NP_766660.1	hypothetical protein	Q
bll0021	18497	20497	666		NP_766661.1	hypothetical protein	S
bsr0022	21525	21815	96		NP_766662.1	hypothetical protein
blr0023	21972	23081	369		NP_766663.1	transposase	L
blr0024	23634	24011	125		NP_766664.1	hypothetical protein
bll0025	24726	26486	586		NP_766665.1	myosin-cross-reactive antigen	S
bll0026	26532	27290	252		NP_766666.1	dehydrogenase	S
bsr0027	27698	27958	86		NP_766667.1	hypothetical protein
blr0028	28473	29315	280		NP_766668.1	hypothetical protein
bsr0029	29412	29699	95		NP_766669.1	hypothetical protein
blr0030	29792	31372	526		NP_766670.1	recombinase	L
bll0031	31338	31715	125		NP_766671.1	hypothetical protein
bsl0032	31759	31944	61		NP_766672.1	hypothetical protein
bsr0033	32239	32472	77		NP_766673.1	hypothetical protein	G
blr0034	32885	33310	141		NP_766674.1	transposase	L
blr0035	33307	33663	118		NP_766675.1	hypothetical protein	L
bsr0036	33782	33952	56		NP_766676.1	hypothetical protein
blr0037	33965	34321	118		NP_766677.1	hypothetical protein	E
bsr0038	34579	34860	93		NP_766678.1	transcriptional regulator	K
bsr0039	35259	35498	79		NP_766679.1	hypothetical protein	S
bll0040	35827	36150	107		NP_766680.1	hypothetical protein	S
bsl0041	36259	36432	57		NP_766681.1	hypothetical protein
bll0042	36857	37297	146		NP_766682.1	hypothetical protein	S
bll0043	37305	39332	675	traG	NP_766683.1	conjugal transfer coupling protein TraG	U
bll0044	39329	41203	624		NP_766684.1	hypothetical protein	U
bll0045	41537	42445	302		NP_766685.1	transglycosylase	M
bll0046	42450	42785	111		NP_766686.1	hypothetical protein	S
bll0047	42820	43365	181	traF	NP_766687.1	conjugal transfer protein	O, U
bll0048	43362	43880	172		NP_766688.1	hypothetical protein	S
bsl0049	43867	44133	88		NP_766689.1	hypothetical protein	S
bll0050	44130	44768	212		NP_766690.1	partition protein	D
bll0051	44765	46042	425	repA	NP_766691.1	replication protein A	L
bll0052	45894	46265	123		NP_766692.1	hypothetical protein	S
bll0053	46349	47044	231		NP_766693.1	hypothetical protein	S
bsl0054	47255	47518	87		NP_766694.1	hypothetical protein	S
bsr0055	47732	47983	83		NP_766695.1	transcriptional regulator	K
blr0056	48147	48557	136		NP_766696.1	hypothetical protein
bll0057	48674	49036	120		NP_766697.1	hypothetical protein	S
blr0058	49708	50049	113		NP_766698.1	hypothetical protein
bsl0059	50081	50314	77	cspA	NP_766699.1	cold shock protein	K
blr0060	50722	51495	257		NP_766700.1	hypothetical protein	Q
bll0061	51544	52068	174		NP_766701.1	hypothetical protein	S
blr0062	52262	52930	222	atc1	NP_766702.1	Atc1 protein	S
bll0063	53006	53935	309		NP_766703.1	hypothetical protein	S
bll0064	54262	55320	352		NP_766704.1	hypothetical protein	S
bll0065	55377	57515	712		NP_766705.1	DNA-binding protein	K
bll0066	57643	58884	413		NP_766706.1	hypothetical protein	S
bsr0067	59742	59957	71		NP_766707.1	hypothetical protein	S
bll0068	60225	61631	468		NP_766708.1	exonuclease I	L
bll0069	61639	62160	173		NP_766709.1	hypothetical protein	S
bll0070	62157	62552	131		NP_766710.1	hypothetical protein	K
bsr0071	62687	62908	73		NP_766711.1	hypothetical protein	S
blr0072	62984	64234	416		NP_766712.1	hypothetical protein	S
blr0073	64235	64690	151		NP_766713.1	hypothetical protein	S
blr0074	64674	65810	378		NP_766714.1	hypothetical protein	S
bll0075	66173	66727	184		NP_766715.1	hypothetical protein
bll0076	66843	68654	603		NP_766716.1	hypothetical protein	S
blr0077	68941	70365	474		NP_766717.1	hypothetical protein	S
bsr0078	70615	70776	53		NP_766718.1	hypothetical protein	L
